# Supplementary material
Source: Springer Nature journal article supplement (https://www.springermedizin.de/resource/supplementary/13012_2010_276_MOESM1_ESM.pdf/9629614)
Supplement: MOESM1 [file 9629614]

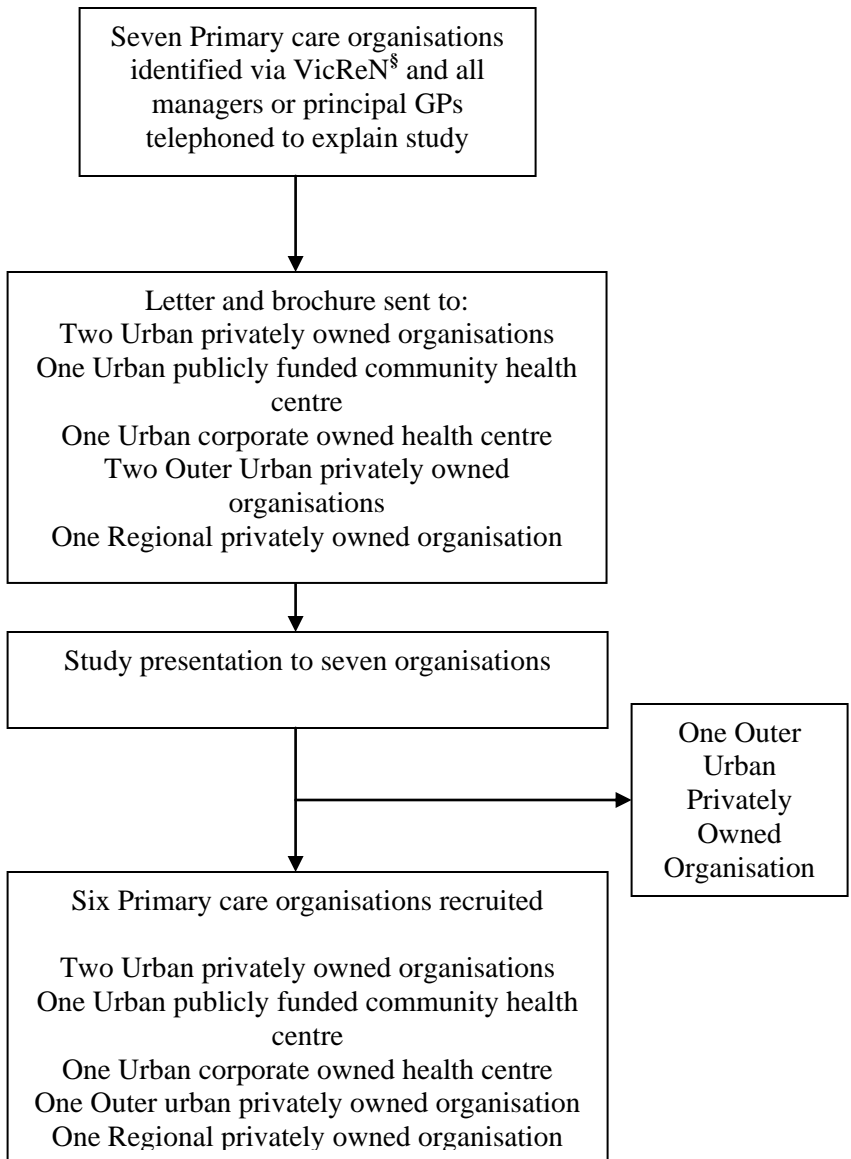

<sup>§</sup> VicRen is the Victorian Primary Care Practice-Based Research Network comprising lead researchers and practitioners to encourage the conduct of evidence-based primary care practice in Victoria, Australia.
